# Supplementary material for: Short Wavelength (Blue) Light Is Protective for Lens-Induced Myopia in Guinea Pigs Potentially Through a Retinoic Acid–Related Mechanism
Source: PubMed Central journal article supplement — Invest Ophthalmol Vis Sci. 2021 Jan 21;62(1):21. doi: 10.1167/iovs.62.1.21 (PMC7817876; doi:10.1167/iovs.62.1.21), 2021-01-21
Supplement: iovs-62-1-21_s002.pdf [file iovs-62-1-21_s002.pdf]

**Table 2.** Summary of mean values in Refractive Error (Diopter, D), Vitreous Chamber Depth (VCD, mm) and Axial Length (AL, mm), Anterior Chamber Depth (ACD, mm), Lens Thickness (LT, mm) and Corneal Radius Curvature (CRC, mm) (mean  $\pm$  SD) for guinea pigs under white light (WL) or short-wavelength light (SL) fitted with monocular  $-5$ D lenses fed with retinoic acid (W+RA, S+RA) or citral (W+CI, S+CI) for 4 weeks (w).

|                      |    | Lens-treated eye |                 | Fellow eye      |                 |
|----------------------|----|------------------|-----------------|-----------------|-----------------|
|                      |    | W+RA             | S+RA            | W+RA            | S+RA            |
| Refractive error (D) | 0w | 3.95 $\pm$ 0.95  | 4.30 $\pm$ 0.96 | 4.05 $\pm$ 1.01 | 4.26 $\pm$ 0.94 |
|                      | 2w | -0.25 $\pm$ 1.11 | 2.55 $\pm$ 1.32 | 3.81 $\pm$ 1.23 | 4.48 $\pm$ 1.34 |
|                      | 4w | -3.53 $\pm$ 0.90 | 1.66 $\pm$ 1.03 | 3.25 $\pm$ 1.28 | 4.61 $\pm$ 0.70 |
| VCD (mm)             | 0w | 3.14 $\pm$ 0.08  | 3.15 $\pm$ 0.07 | 3.15 $\pm$ 0.09 | 3.15 $\pm$ 0.06 |
|                      | 2w | 3.53 $\pm$ 0.08  | 3.42 $\pm$ 0.08 | 3.28 $\pm$ 0.08 | 3.24 $\pm$ 0.07 |
|                      | 4w | 3.61 $\pm$ 0.06  | 3.46 $\pm$ 0.08 | 3.36 $\pm$ 0.09 | 3.28 $\pm$ 0.11 |
| AL (mm)              | 0w | 7.53 $\pm$ 0.18  | 7.59 $\pm$ 0.15 | 7.54 $\pm$ 0.19 | 7.58 $\pm$ 0.16 |
|                      | 2w | 8.23 $\pm$ 0.11  | 8.13 $\pm$ 0.18 | 7.88 $\pm$ 0.18 | 7.81 $\pm$ 0.18 |
|                      | 4w | 8.42 $\pm$ 0.07  | 8.22 $\pm$ 0.15 | 8.07 $\pm$ 0.12 | 7.95 $\pm$ 0.17 |
| ACD (mm)             | 0w | 1.25 $\pm$ 0.03  | 1.26 $\pm$ 0.03 | 1.25 $\pm$ 0.03 | 1.26 $\pm$ 0.03 |
|                      | 2w | 1.30 $\pm$ 0.03  | 1.31 $\pm$ 0.05 | 1.30 $\pm$ 0.02 | 1.30 $\pm$ 0.03 |
|                      | 4w | 1.30 $\pm$ 0.03  | 1.31 $\pm$ 0.02 | 1.30 $\pm$ 0.02 | 1.31 $\pm$ 0.05 |
| LT (mm)              | 0w | 3.14 $\pm$ 0.08  | 3.17 $\pm$ 0.06 | 3.14 $\pm$ 0.07 | 3.17 $\pm$ 0.07 |
|                      | 2w | 3.40 $\pm$ 0.05  | 3.40 $\pm$ 0.10 | 3.31 $\pm$ 0.07 | 3.27 $\pm$ 0.08 |
|                      | 4w | 3.50 $\pm$ 0.02  | 3.46 $\pm$ 0.10 | 3.41 $\pm$ 0.05 | 3.36 $\pm$ 0.12 |
| CRC (mm)             | 0w | 3.42 $\pm$ 0.10  | 3.48 $\pm$ 0.13 | 3.42 $\pm$ 0.11 | 3.48 $\pm$ 0.10 |
|                      | 2w | 3.51 $\pm$ 0.09  | 3.53 $\pm$ 0.05 | 3.57 $\pm$ 0.10 | 3.57 $\pm$ 0.11 |
|                      | 4w | 3.61 $\pm$ 0.08  | 3.63 $\pm$ 0.04 | 3.67 $\pm$ 0.09 | 3.71 $\pm$ 0.11 |
|                      |    | W+CI             | S+CI            | W+CI            | S+CI            |
| Refractive error (D) | 0w | 3.80 $\pm$ 0.88  | 3.75 $\pm$ 1.27 | 3.89 $\pm$ 0.86 | 3.88 $\pm$ 1.30 |
|                      | 2w | 3.42 $\pm$ 1.67  | 6.11 $\pm$ 1.21 | 6.28 $\pm$ 1.59 | 7.17 $\pm$ 1.35 |
|                      | 4w | 3.39 $\pm$ 1.65  | 5.25 $\pm$ 0.80 | 5.61 $\pm$ 1.34 | 7.08 $\pm$ 0.61 |
| VCD (mm)             | 0w | 3.18 $\pm$ 0.07  | 3.16 $\pm$ 0.08 | 3.16 $\pm$ 0.05 | 3.14 $\pm$ 0.06 |
|                      | 2w | 3.38 $\pm$ 0.14  | 3.26 $\pm$ 0.08 | 3.25 $\pm$ 0.07 | 3.23 $\pm$ 0.05 |
|                      | 4w | 3.42 $\pm$ 0.11  | 3.29 $\pm$ 0.03 | 3.28 $\pm$ 0.05 | 3.27 $\pm$ 0.08 |
| AL (mm)              | 0w | 7.63 $\pm$ 0.13  | 7.64 $\pm$ 0.16 | 7.61 $\pm$ 0.13 | 7.56 $\pm$ 0.13 |
|                      | 2w | 8.03 $\pm$ 0.21  | 7.84 $\pm$ 0.21 | 7.79 $\pm$ 0.18 | 7.78 $\pm$ 0.13 |
|                      | 4w | 8.09 $\pm$ 0.19  | 7.93 $\pm$ 0.06 | 7.86 $\pm$ 0.16 | 7.85 $\pm$ 0.17 |
| ACD (mm)             | 0w | 1.26 $\pm$ 0.03  | 1.26 $\pm$ 0.04 | 1.27 $\pm$ 0.03 | 1.26 $\pm$ 0.02 |
|                      | 2w | 1.30 $\pm$ 0.04  | 1.30 $\pm$ 0.04 | 1.29 $\pm$ 0.03 | 1.30 $\pm$ 0.03 |
|                      | 4w | 1.30 $\pm$ 0.02  | 1.30 $\pm$ 0.01 | 1.30 $\pm$ 0.02 | 1.30 $\pm$ 0.03 |

|             |    |           |           |           |           |
|-------------|----|-----------|-----------|-----------|-----------|
| LT<br>(mm)  | 0w | 3.19±0.06 | 3.22±0.09 | 3.18±0.07 | 3.16±0.05 |
|             | 2w | 3.34±0.08 | 3.28±0.10 | 3.26±0.10 | 3.26±0.06 |
|             | 4w | 3.37±0.09 | 3.34±0.03 | 3.29±0.12 | 3.27±0.08 |
| CRC<br>(mm) | 0w | 3.41±0.13 | 3.36±0.12 | 3.40±0.12 | 3.44±0.13 |
|             | 2w | 3.53±0.12 | 3.54±0.13 | 3.56±0.10 | 3.59±0.12 |
|             | 4w | 3.65±0.15 | 3.67±0.14 | 3.66±0.10 | 3.72±0.12 |
