# Supplementary material for: Short Wavelength (Blue) Light Is Protective for Lens-Induced Myopia in Guinea Pigs Potentially Through a Retinoic Acid–Related Mechanism
Source: PubMed Central journal article supplement — Invest Ophthalmol Vis Sci. 2021 Jan 21;62(1):21. doi: 10.1167/iovs.62.1.21 (PMC7817876; doi:10.1167/iovs.62.1.21), 2021-01-21
Supplement: iovs-62-1-21_s003.pdf [file iovs-62-1-21_s003.pdf]

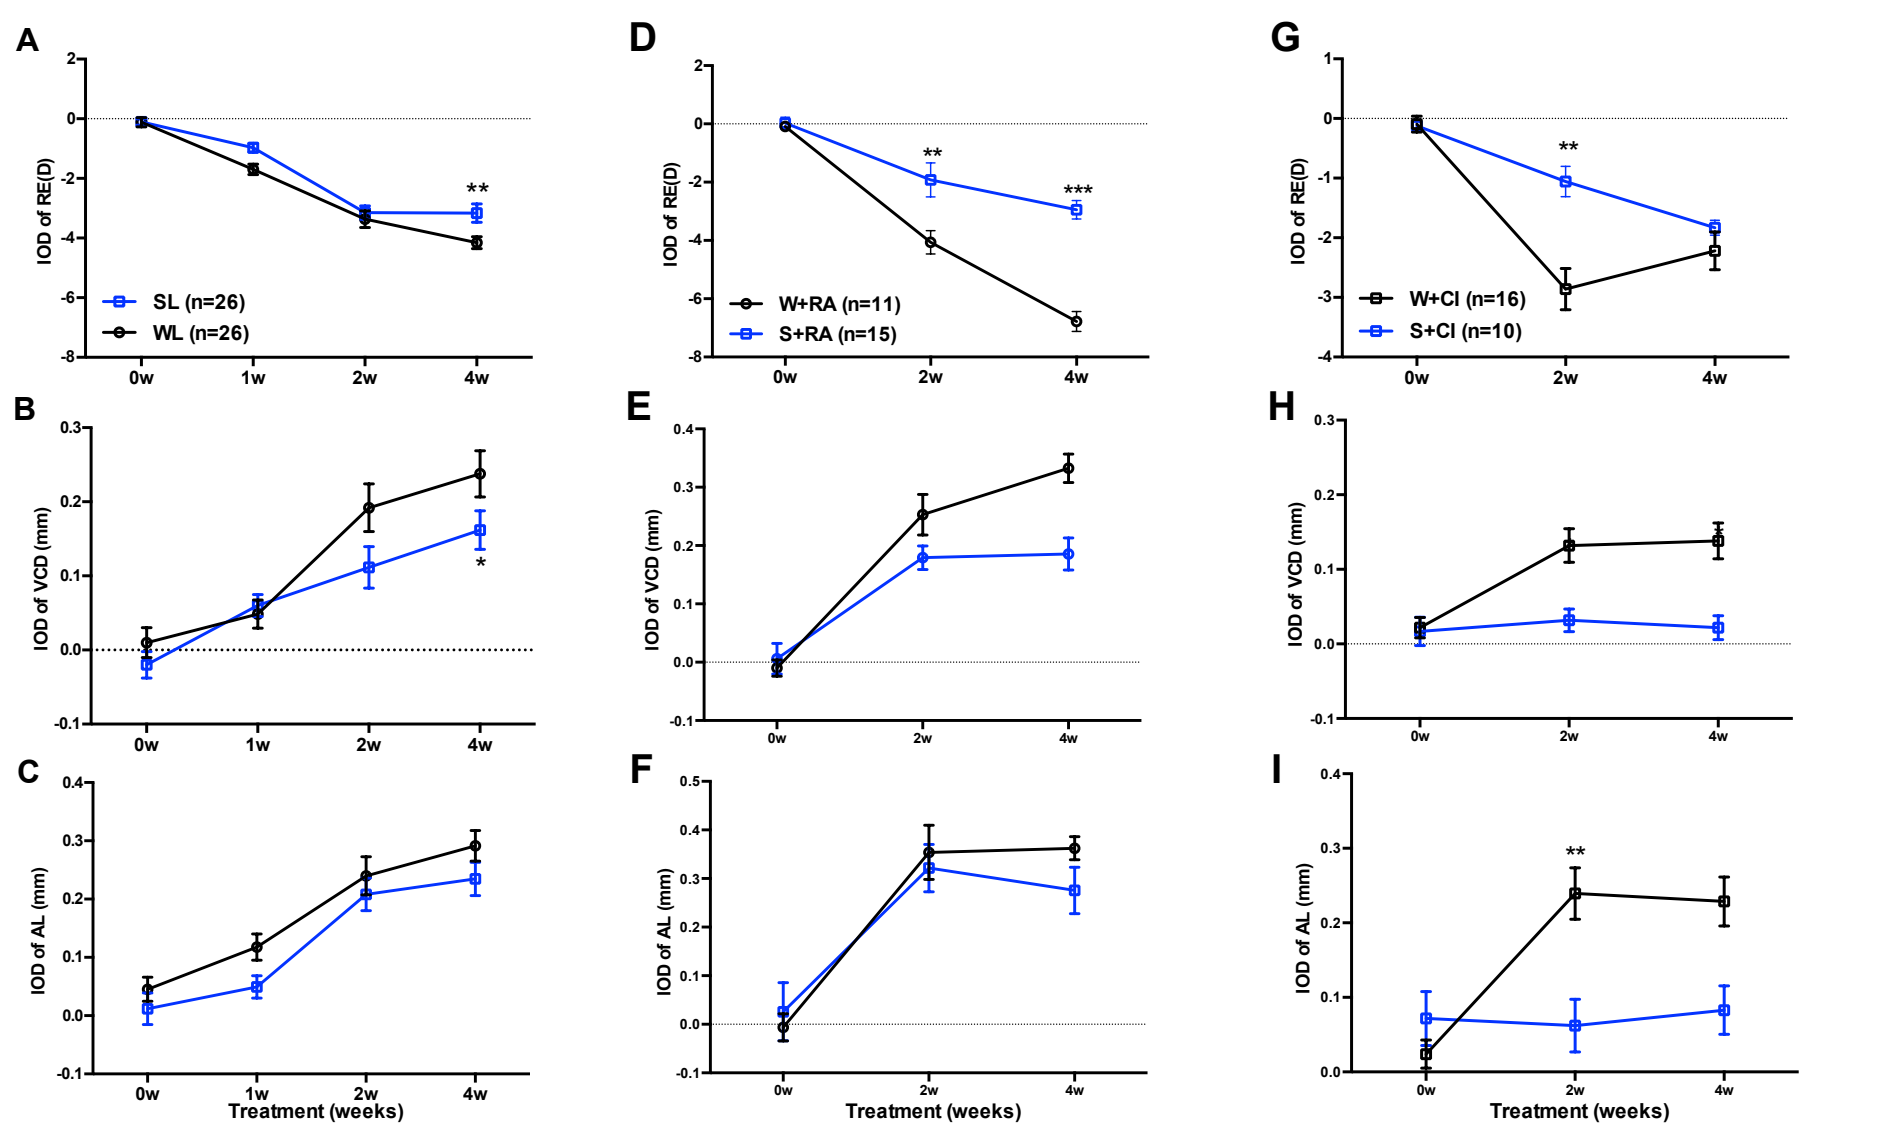

### Supplementary Figure 1

**Interocular differences** (IOD, mean  $\pm$  SEM; treated-fellow) plotted against treatment time (weeks) in (A, D, G) spherical equivalent refractive error (IOD of RE, D), (B, E, H) vitreous chamber depth (IOD of VCD, mm), and (C, F, I) axial length (IOD of AL, mm) in guinea pigs fed with **routine diet (left column, A, B, C)** or **retinoic acid (middle column, D, E, F)** or **citral (right column, G, H, I)** and subjected to the following monocular -5 Diopter lens treatments reared under either short-wavelength light (SL, blue line) or white light (WL, black line).

\*  $p < 0.05$ , \*\*  $p < 0.01$ , \*\*\*  $p < 0.001$ .
