# Supplementary material for: Short Wavelength (Blue) Light Is Protective for Lens-Induced Myopia in Guinea Pigs Potentially Through a Retinoic Acid–Related Mechanism
Source: PubMed Central journal article supplement — Invest Ophthalmol Vis Sci. 2021 Jan 21;62(1):21. doi: 10.1167/iovs.62.1.21 (PMC7817876; doi:10.1167/iovs.62.1.21), 2021-01-21
Supplement: iovs-62-1-21_s004.pdf [file iovs-62-1-21_s004.pdf]

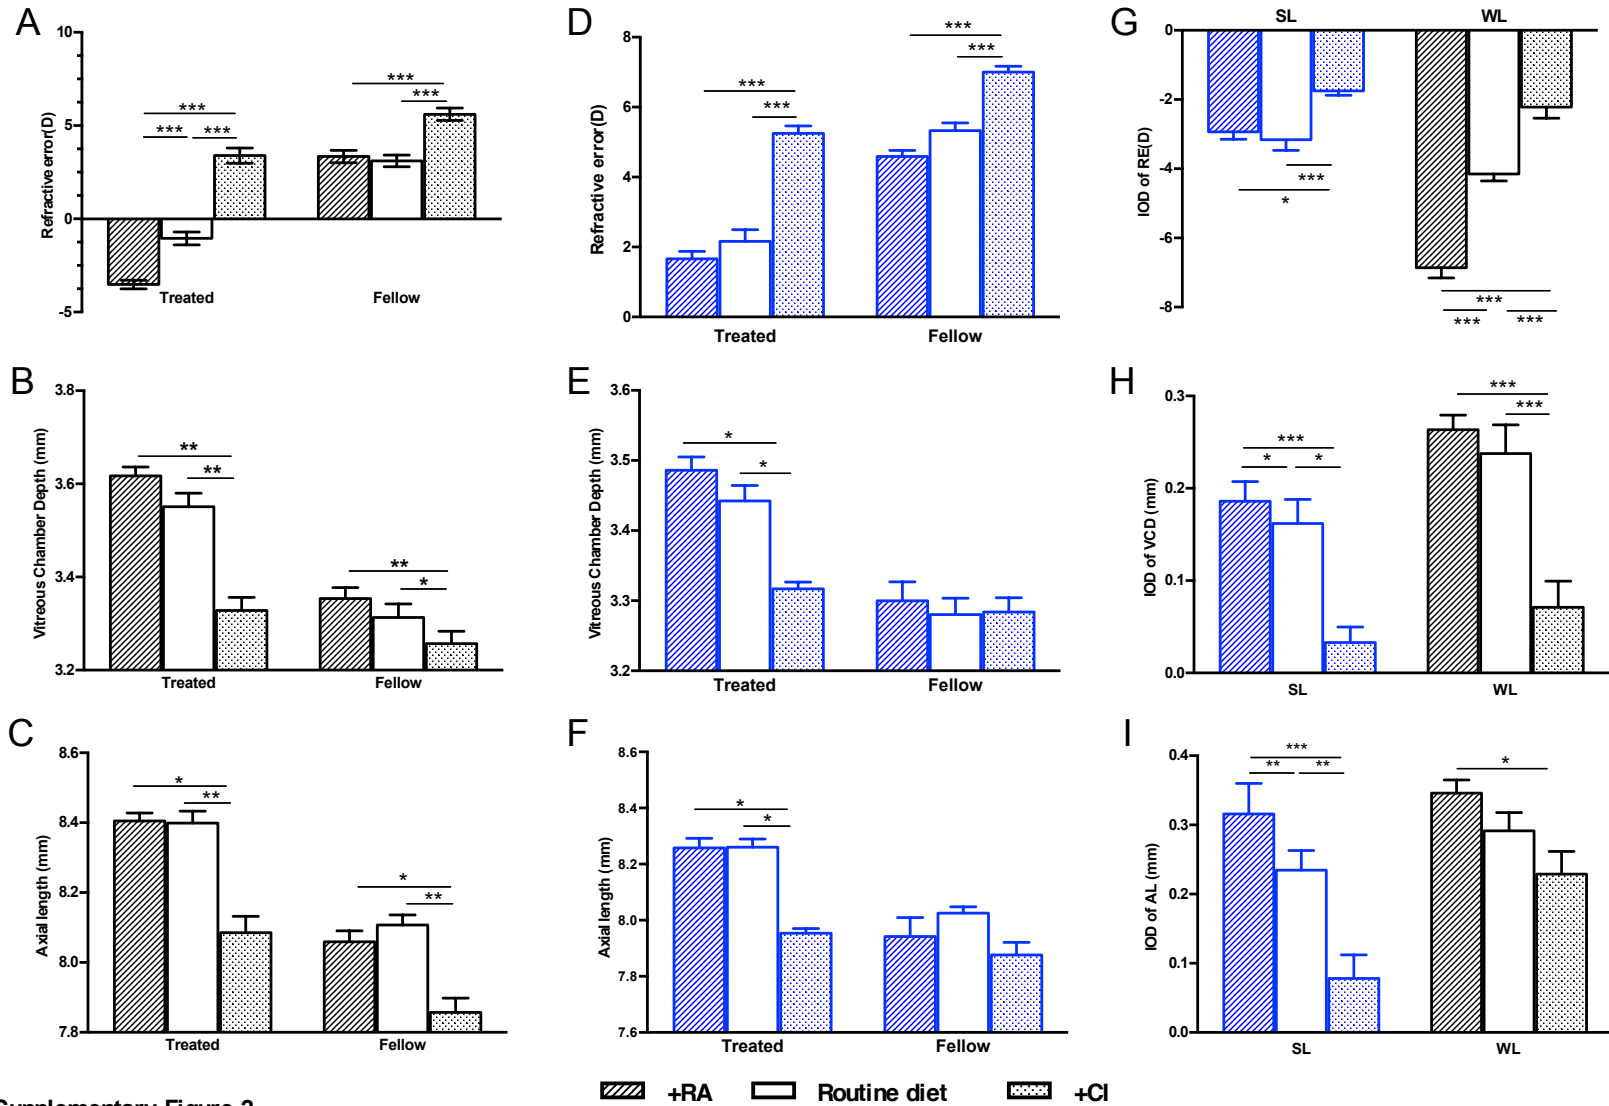

**Supplementary Figure 2.**

**Left column:** Comparison of biometric parameters **at the end of the experiment** among guinea pigs fed with **routine diet (blank bars)**, **retinoic acid (+RA, lined bars)** or **citral (+Ci, dotted bars)** reared under **white light**. Mean± SEM values in (A) refractive error (D), (B) vitreous chamber depth (mm), and (C) axial length (mm) of treated and fellow eyes in guinea pigs wearing monocular **-5D lenses (treated)** reared under white light conditions.

**Middle column:** Comparison of biometric parameters at the end of the experiment among guinea pigs fed with **routine diet (blank bars)**, **retinoic acid (+RA, lined bars)** or **citral (+Ci, dotted bars)** reared under **short-wavelength light**. Mean± SEM values in (D) refractive error (D), (E) vitreous chamber depth (mm), and (F) axial length (mm) of treated and fellow eyes in guinea pigs wearing monocular **-5D lenses (treated)** reared under short-wavelength light conditions.

**Right column:** Comparison of **interocular differences** (IOD, mean ± SEM; treated-fellow) in (G) refractive error (IOD of RE, D), (H) vitreous chamber depth (IOD of VCD, mm), and (I) axial length (IOD of AL, mm) among guinea pigs fed with retinoic acid (+RA, lined bars), routine diet (blank bars) or citral (+Ci, dotted bars) and subjected to the following monocular lens treatments reared under either short-wavelength light (SL, blue bars) or white light (WL, black bars).

\* p<0.05, \*\* p<0.01, \*\*\* p<0.001.
